# Supplementary material for: Single-crystal-to-single-crystal transformation involving release of bridging water molecules and conversion of chain helicity in a chiral three-dimensional metal-organic framework
Source: Royal Society of Chemistry journal article supplement (doi:10.1039/b717885a), 2008-01-01
Supplement: b717885a.pdf [file b717885a.pdf]

## ELECTRONIC SUPPLEMENTARY DATA

for

### **Single-Crystal-to-Single-Crystal Transformation Involving Release of Bridging Water Molecules and Conversion of Chain Helicity in a Chiral Three-Dimensional Metal-Organic Framework**

Dong-Xu Xue,<sup>a</sup> Wei-Xiong Zhang,<sup>a</sup> Xiao-Ming Chen<sup>\*a,b</sup> and He-Zhou Wang<sup>b</sup>

<sup>a</sup>MOE Key Laboratory of Bioinorganic and Synthetic Chemistry, School of Chemistry and Chemical Engineering, Sun Yat-Sen University, Guangzhou 510275, China.

Fax: +86-20-84112245; Tel: +86-20-84112074

e-mail: cxm@mail.sysu.edu.cn

<sup>b</sup>State Key Laboratory of Optoelectronic Materials and Technologies, Sun Yat-Sen University, Guangzhou 510275, China.

#### **Materials and Measurements:**

Solvent and starting materials for synthesis were purchased commercially, and were used as received. H<sub>2</sub>bct was prepared according to the literature procedure.<sup>[1]</sup> Infrared spectra were obtained from KBr pellets on a Bruker TENSOR 27 Fourier Transform Infrared spectrometer in the 400-4000 cm<sup>-1</sup> region. Elemental analyses (C, H, N) were performed on a Perkin-Elmer 240 elemental analyzer. Thermogravimetric analyses (TGA) were performed at a rate of 10 °C/min under air using a NETZSCH TG 209 system. Low-temperature DSC analysis was performed on a NETZSCH DSC 204 instrument. Powder X-ray diffraction (PXRD) data were recorded on a Bruker D8 ADVANCE X-ray powder diffractometer (CuK $\alpha$ , 1.5418 Å). The second harmonic generation (SHG) measurements were performed by the powder Perry and Kurtz method,<sup>[2]</sup> by placing a powder sample in an intense fundamental beam from a Q-switched Nd:YAG laser of wavelength 1064 nm.

Synthesis of **1**: A reaction of a mixture of  $\text{Cd}(\text{NO}_3)_2 \cdot 4\text{H}_2\text{O}$  (0.154 g, 0.5 mmol),  $\text{H}_2\text{bct}$  (0.136 g, 0.5 mmol), iso-propyl alcohol (5.0 mL), and water (5.0 mL) in a 12-mL Teflon-lined bomb at 120 °C for 3 days afforded colourless prismatic crystals (yield *ca.* 68%). Anal. calcd (%) for  $\text{C}_6\text{H}_6\text{CdN}_2\text{O}_5\text{S}_3$ : C, 18.3; H, 1.5; N, 7.1. Found: C, 18.2; H, 1.5; N, 7.1. IR (KBr pellet,  $\text{cm}^{-1}$ ): 1563(s), 1369(s), 1239(m), 1067(m), 897(m), 770(w), 675(m).

Synthesis of **2**: A single crystal or bulk crystals of **1** were heated at 180 °C for 30 min under vacuum to produce a single crystal and bulk crystals of **2** for single-crystal X-ray diffraction and other measurements, respectively. Anal. calcd (%) for  $\text{C}_6\text{H}_4\text{CdN}_2\text{O}_4\text{S}_3$ : C, 19.1; H, 1.3; N, 7.4. Found: C, 19.0; H, 1.3; N, 7.5. IR (KBr pellet,  $\text{cm}^{-1}$ ): 1558(s), 1420(s), 1227(m), 1049(m), 940(m), 891(m), 698(w).

Single-crystal X-ray diffraction measurements for all data were carried out on a Bruker Smart APEX CCD area-detector diffractometer ( $\text{MoK}\alpha$ , 0.71073 Å) at 293(2) K. Absorption corrections were applied by using multi-scan program SADABS. The structures were solved with direct methods and refined with a full-matrix least-squares technique with the SHELXTL program package.<sup>3</sup>

## Reference

- 1 X.-H. Lou, Y. Zhu, H. Gao, A.-X. Zhu, Y.-T. Fan, H.-W. Hou, H.-J. Lu, *Chin. J. Inorg. Chem.*, 2005, **21**, 716.
- 2 S. K. Kurtz, T. T. Perry, *J. Appl. Phys.*, 1968, **39**, 3798.
- 3 (a) SMART Version 5.625, SAINT+ Version 6.22. Bruker Analytical X-ray System, Inc., Madison, Wisconsin, USA, 2001; (b) G. M. Sheldrick, SHELXTL, Version 6.10. Bruker Analytical X-ray System, Siemens Industrial Automation Inc., Madison, Wisconsin, USA, 2000.

**Table S1** Selected Bond Lengths (Å) and Bond Angles (°) for **1**·mpm and **2**·pmm.

| <b>1</b> ·mpm |           |              |            |
|---------------|-----------|--------------|------------|
| Cd1-O1a       | 2.2666(2) | Cd1-O1w      | 2.3954(2)  |
| Cd1-O1wc      | 2.3909(2) | Cd1-N2b      | 2.3477(2)  |
| Cd1-O3        | 2.2276(2) | Cd1-O4d      | 2.2977(2)  |
| O1w-Cd1-N2b   | 97.225(4) | N2b-Cd1-O4d  | 100.686(4) |
| O4d-Cd1-O1wc  | 76.302(3) | O1wc-Cd1-O1w | 83.947(3)  |
| O3-Cd1-O1w    | 96.925(4) |              |            |
| <b>2</b> ·pmm |           |              |            |
| Cd1-O3        | 2.256(1)  | Cd1-O4       | 2.532(1)   |
| Cd1-N2b       | 2.467(1)  | Cd1-O4c      | 2.288(1)   |
| Cd1-O2e       | 2.315(1)  | Cd1-O1a      | 2.275(1)   |
| O3-Cd1-O4     | 54.33(1)  | O1a-Cd1-O2e  | 91.39(1)   |
| O3-Cd1-N2b    | 88.71(3)  | O2e-Cd1-O4c  | 82.76(1)   |
| N2b-Cd1-O4    | 119.01(2) | O4c-Cd1-O1a  | 94.49(2)   |

Symmetry codes for **1**·mpm: a,  $-x + 1/2, -y + 1, z + 1/2$ ; b,  $x - 1/2, -y + 1/2, -z$ ; c,  $x - 1/2, -y + 3/2, -z$ ; d,  $x - 1, y, z$ . For **2**·pmm: a,  $-x - 3/2, -y, z + 1/2$ ; b,  $x + 1/2, -y + 1/2, -z$ ; c,  $x + 1/2, -y - 1/2, -z$ ; e,  $-x - 1/2, -y, z + 1/2$ .

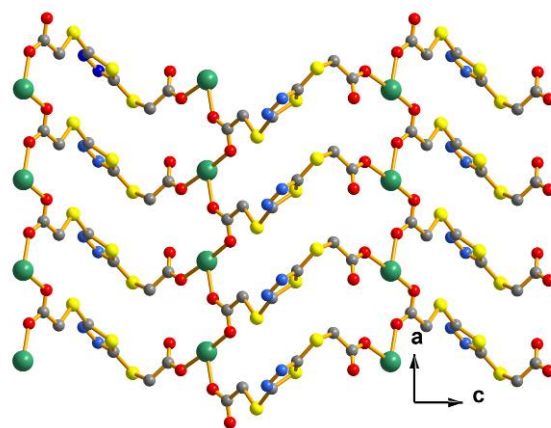

(a)

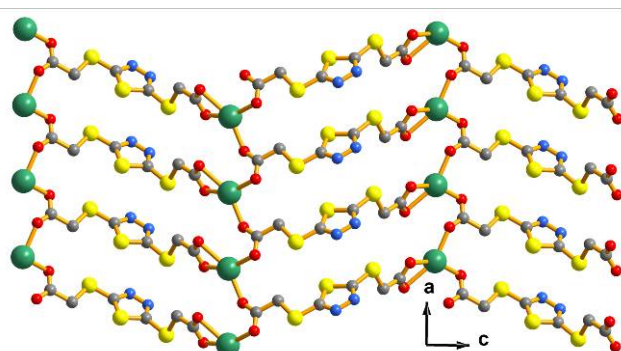

(b)

**Fig. S1** Perspective view of the 2-D layer viewed along the *b*-axis in **1**-mpm (a) and **2**-pmm (b).

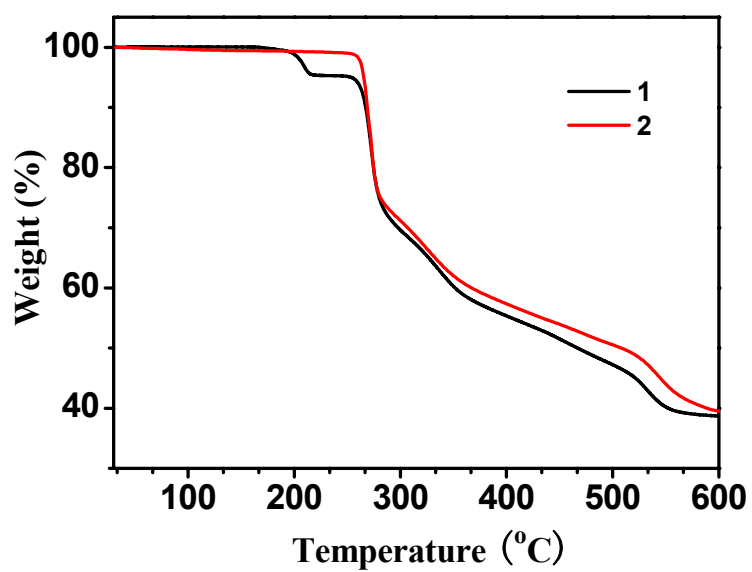

**Fig. S2** TGA plots of **1** and **2** recorded in air.

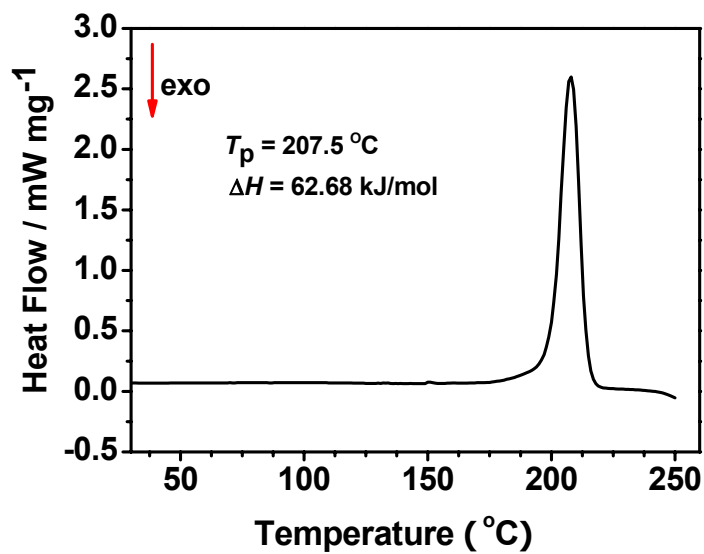

Fig. S3 DSC plot of **1** recorded in nitrogen gas.

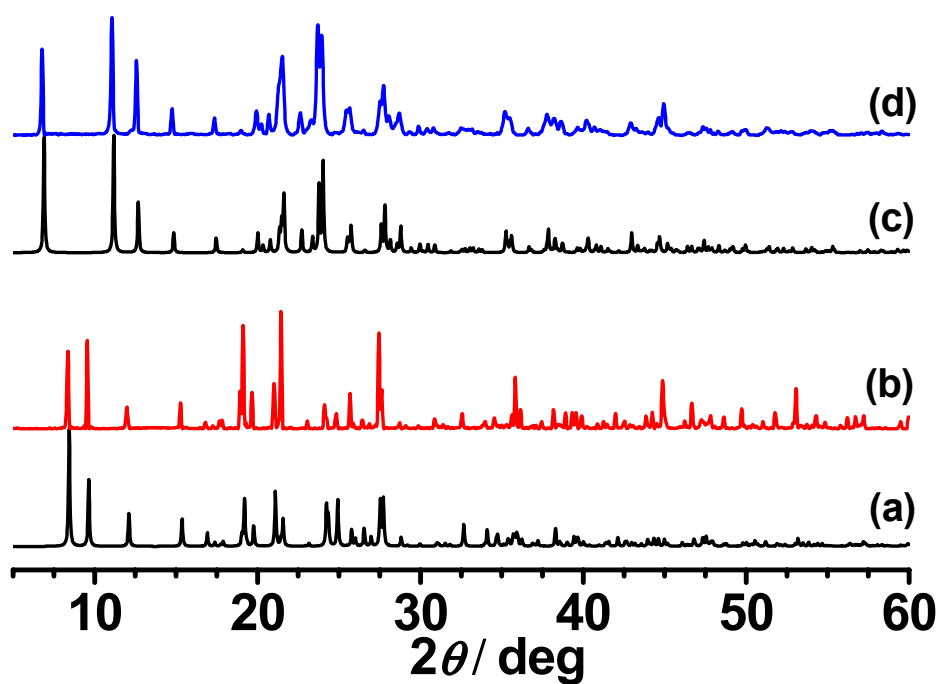

Fig. S4 PXRD patterns for (a) simulated **1**; (b) as-synthesized **1**; (c) simulated **2**; (d) as-synthesized **2** upon heating **1** at 180 °C for 30 minutes under vacuum.

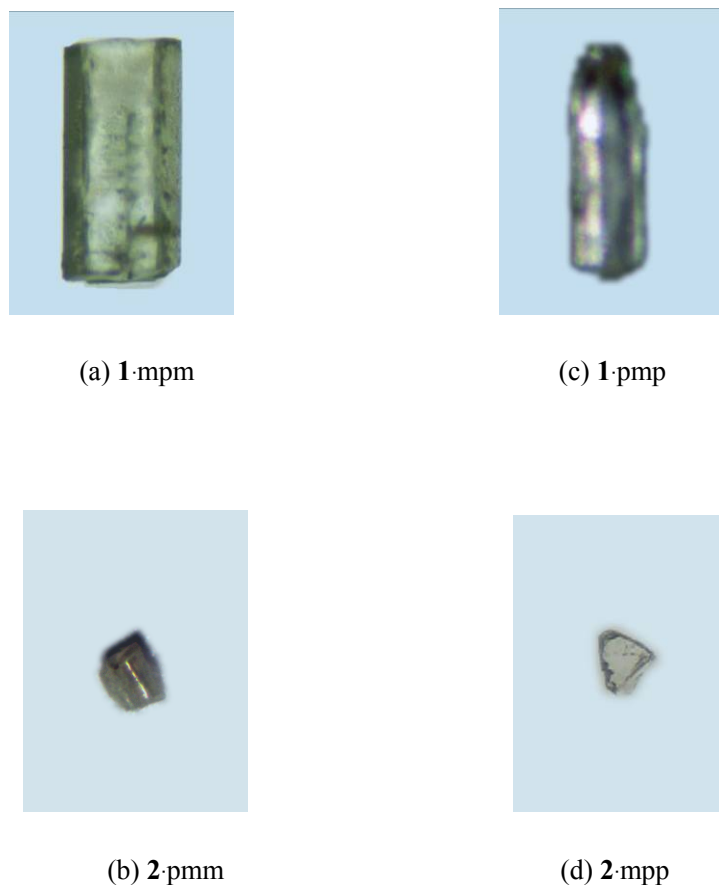

**Fig. S5** Photos of the single crystals of 1·mpm (a), 2·pmm (b), 1·pmp (c), and 2·mpp (d).

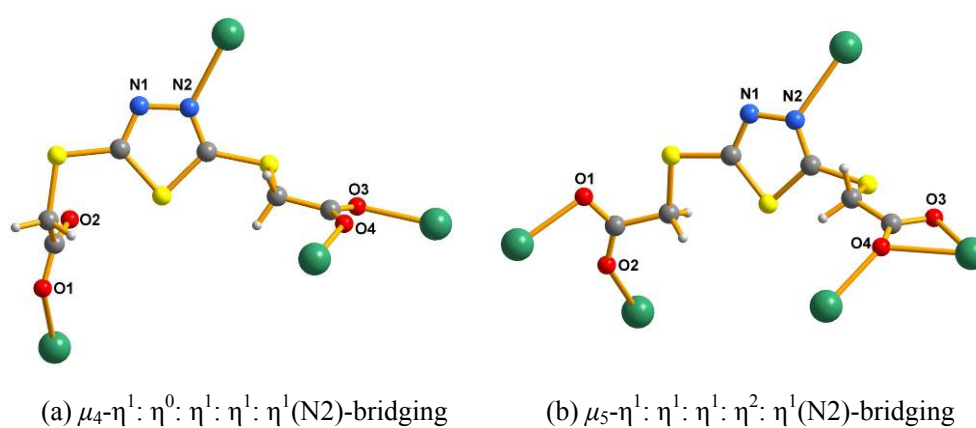

**Fig. S6** Different conformations and corresponding coordination modes of bct in 1·mpm (a) and 2·pmm (b).

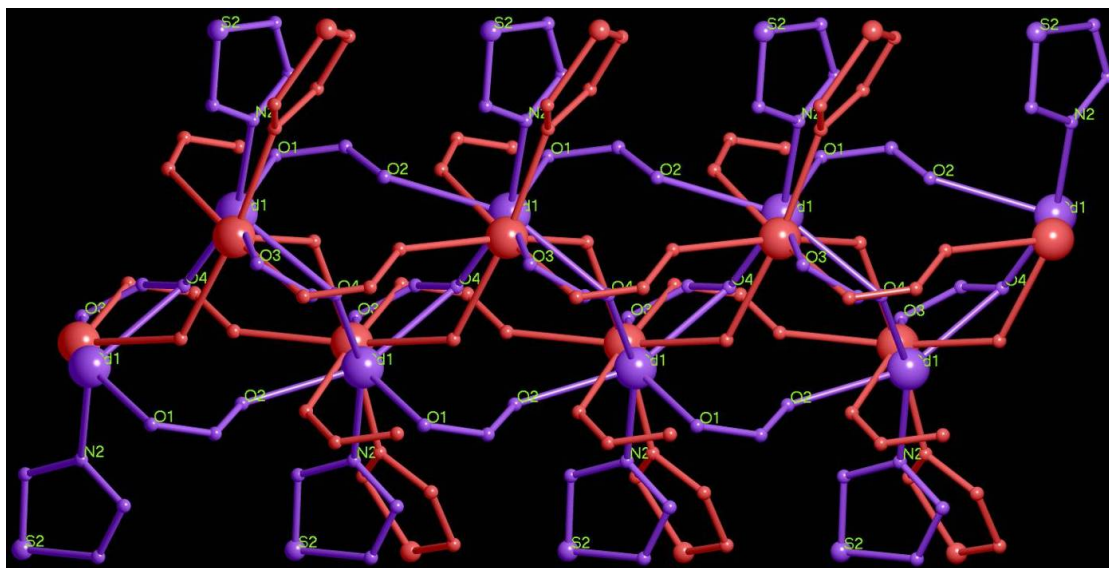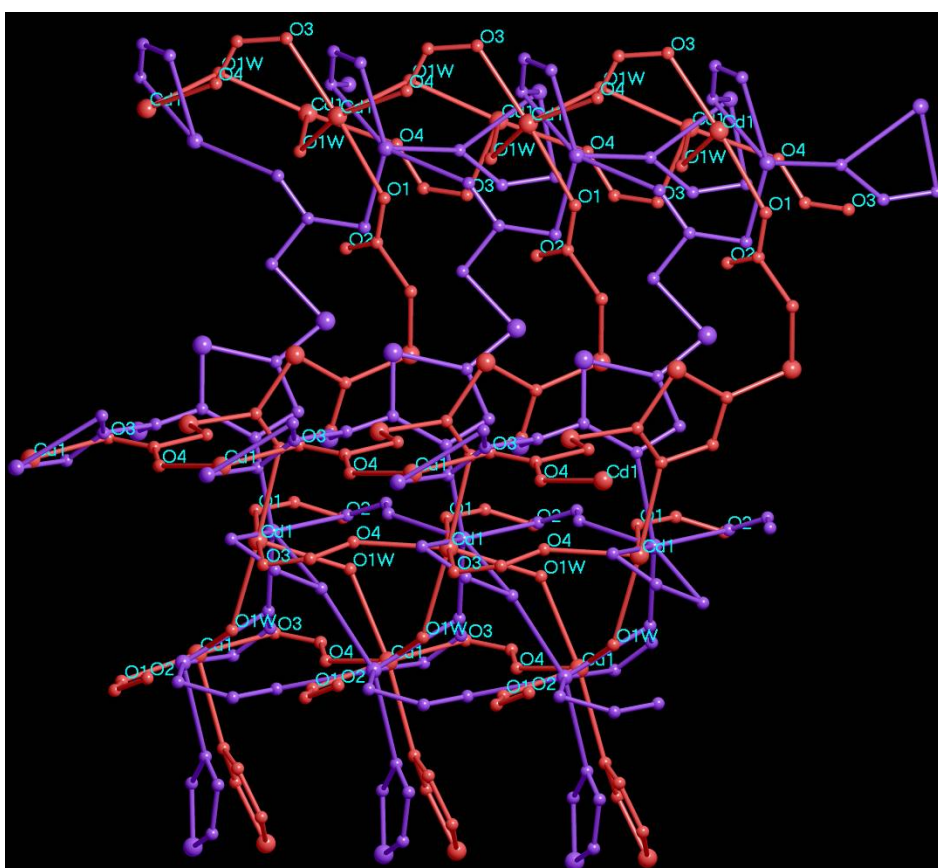

**Fig. S7** Perspective views of the structural superpositions of **1-mpm** (red) and **2-pmm** (lavender) in two different directions. Some bct ligands are simplified for clarity in the plots.
